# Supplementary material for: Safety and Effectiveness of Vedolizumab and Ustekinumab in Elderly Patients with Inflammatory Bowel Disease: A Real-Life Multicentric Cohort Study
Source: MDPI journal article supplement (doi:10.3390/jcm13020365), 2024-01-09
Supplement: s1 [file s1]

## Supplementary Tables

**Supplementary Tables S1.** Corticosteroid free remission at 6 months in the elderly cohort treated with vedolizumab or ustekinumab.

|                          | Exp(B) | 95% CI interval | P value |
|--------------------------|--------|-----------------|---------|
| Studied biological (UST) | 0.449  | 0.200-1.007     | 0.052   |
| IBD type (CD)            | 0.712  | 0.050-10.104    | 0.802   |
| Previous anti-TNF        | 0.664  | 0.153-2.879     | 0.584   |
| Previous surgery         | 0.619  | 0.272-1.407     | 0.252   |
| Propensity score elderly | 2.161  | 0.004-1305.49   | 0.814   |
| Constant                 | 1.416  |                 | 0.304   |

**Supplementary Table S2.** Corticosteroid free remission at 1 year in the elderly cohort treated with vedolizumab or ustekinumab.

|                          | Exp(B) | 95% CI interval | P value |
|--------------------------|--------|-----------------|---------|
| Studied biological (UST) | 0.432  | 0.184-1.011     | 0.053   |
| IBD type (CD)            | 3.018  | 0.187-48.769    | 0.436   |
| Previous anti-TNF        | 1.311  | 0.285-6.030     | 0.728   |
| Previous surgery         | 0.779  | 0.340-1.787     | 0.556   |
| Propensity score elderly | 0.231  | 0.000-192.36    | 0.669   |
| Constant                 | 1.058  |                 | 0.875   |

**Supplementary Table S3.** Outcomes in elderly UC versus CD patients

|                                            | UC<br>(n=70)  | CD<br>(n=101)  | p-value |
|--------------------------------------------|---------------|----------------|---------|
| <b>Corticosteroid-free remission (yes)</b> |               |                |         |
| <b>Week 8-14</b>                           | 20/68 (29.4%) | 17/96 (17.7%)  | 0.077   |
| 6 months                                   | 33/64 (51.6%) | 35/90 (38.9%)  | 0.119   |
| 1 year                                     | 29/59 (49.2%) | 42/82 (51.2%)  | 0.809   |
| <b>2 year</b>                              | 25/44 (56.8%) | 30/65 (46.2%)  | 0.275   |
| <b>Endoscopic remission (yes)</b>          |               |                |         |
| <b>6 months</b>                            | 5/15 (33.3%)  | 3/15 (20%)     |         |
| <b>1 year</b>                              | 11/21 (52.4%) | 12/27 (44.4%)  |         |
| <b>Safety</b>                              |               |                |         |
| <b>Any AE (yes)</b>                        | 28/70 (40%)   | 41/101 (40.6%) | 0.938   |
| Any infection (yes)                        | 10/70 (14.3%) | 11/101 (10.9%) | 0.506   |
| Gastro-intestinal infection                | 3/70 (4.3%)   | 3/101 (3%)     | 0.690   |
| <b>Any serious adverse event (yes)</b>     | 13/70 (18.6%) | 29/101 (28.7%) | 0.130   |

|                                      |             |                |       |
|--------------------------------------|-------------|----------------|-------|
| <b>Hospitalisation for IBD flare</b> | 7/70 (10%)  | 12/101 (11.9%) | 0.700 |
| Hospitalisation (not for IBD flare)  | 4/70 (5.7%) | 14/101 (13.9%) | 0.088 |
| Malignancy                           | 1/70 (1.4%) | 3/101 (3%)     | 0.645 |
| <b>Death</b>                         | 0           | 2/101 (2%)     | 0.514 |
